# Supplementary material for: ICAM-1 regulates macrophage polarization by suppressing MCP-1 expression via miR-124 upregulation
Source: PubMed Central journal article supplement (PMC5762366; doi:10.18632/oncotarget.22948), 2017-12-05
Supplement: oncotarget-08-111882-s001.pdf [file oncotarget-08-111882-s001.pdf]

## ICAM-1 regulates macrophage polarization by suppressing MCP-1 expression via miR-124 upregulation

### SUPPLEMENTARY MATERIALS

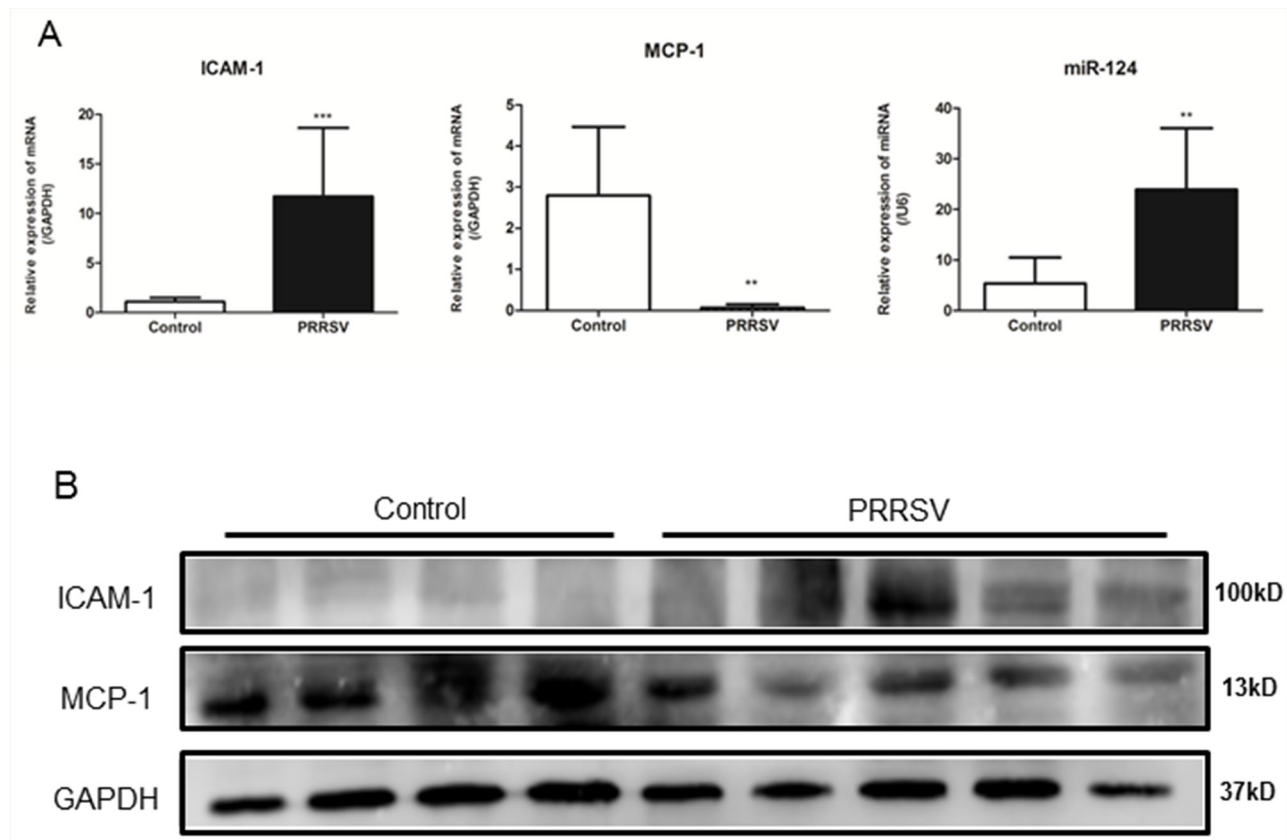

**Supplementary Figure 1: Expression of ICAM-1, MCP-1 and miR-124 in PRRSV-infected swine lungs.** (A) ICAM-1, MCP-1 and miR-124 mRNA expressions were determined by real-time qPCR. The data in graph were shown in mean  $\pm$  SEM of 4 animals. (B) Protein expressions of ICAM-1 and MCP-1 were determined by Western blotting (n=4 for each groups \*\* p < 0.01, \*\*\* p < 0.001).
